# Supplementary material for: Characterization of the Nero Siciliano Pig Fecal Microbiota after a Liquid Whey-Supplemented Diet
Source: MDPI journal article supplement (doi:10.3390/ani13040642), 2023-02-12
Supplement: s1 [file s1]

**Table S1.** Environmental parameters detected inside and outside the barn before (T0, May), and one (T1, June) and two (T2, July) months after the beginning of the study.

| Environmental parameters | Experimental period |         |        |         |        |         |
|--------------------------|---------------------|---------|--------|---------|--------|---------|
|                          | T0                  |         | T1     |         | T2     |         |
|                          | Inside              | Outside | Inside | Outside | Inside | Outside |
| Temperature (°C)         | 21.5                | 22      | 24.5   | 25      | 26     | 26.5    |
| Relative humidity (%)    | 61                  | 62      | 61     | 62      | 53     | 55      |

The parameters reported are expressed as mean values
